# Supplementary material for: Treatment Outcomes of Proton Beam Therapy for Esophageal Squamous Cell Carcinoma at a Single Institute
Source: MDPI journal article supplement (doi:10.3390/cancers15235524), 2023-11-22
Supplement: s1 [file s1]

**Supplementary Table S1.** Univariate analysis for overall survival and progression free survival

|                   |                 | Overall survival |               |                   |                 | Progression free survival |                   |                 |
|-------------------|-----------------|------------------|---------------|-------------------|-----------------|---------------------------|-------------------|-----------------|
| Factor            |                 | Patient (%)      | Mean (months) | 95% CI (months)   | <i>p</i> -value | Mean (months)             | 95% CI (months)   | <i>p</i> -value |
| Age               | <70             | 63 (47.7)        | 63.1          | (55.413 – 70.841) | 0.070           | -                         | -                 | 0.763           |
|                   | ≥70             | 69 (52.3)        | 56.7          | (47.692 – 65.803) |                 | -                         | -                 |                 |
| Gender            | Male            | 121 (91.7)       | 62.8          | (56.270 – 69.402) | 0.439           | -                         | -                 | 0.838           |
|                   | Female          | 11 (8.3)         | 40.2          | (30.292 – 50.188) |                 | -                         | -                 |                 |
| ECOG PS           | 0               | 62 (47.0)        | 62.9          | (55.805 – 70.025) | 0.008           | -                         | -                 | 0.018           |
|                   | 1               | 65 (49.2)        | 59.8          | (51.272 – 68.389) |                 | -                         | -                 |                 |
|                   | 2               | 5 (3.8)          | 23.0          | (2.306 – 43.614)  |                 | -                         | -                 |                 |
| Tumor location    | Upper thoracic  | 16 (12.1)        | -             | -                 | 0.730           | -                         | -                 | 0.072           |
|                   | Middle thoracic | 53 (40.2)        | -             | -                 |                 | -                         | -                 |                 |
|                   | Lower thoracic  | 59 (44.7)        | -             | -                 |                 | -                         | -                 |                 |
|                   | EG Junction     | 4 (3.0)          | -             | -                 |                 | -                         | -                 |                 |
| cT classification | T1a             | 16 (12.1)        | 46.0          | (43.918 – 48.064) | 0.000           | 42.689                    | (38.045 – 47.333) | 0.003           |
|                   | T1b             | 75 (56.8)        | 60.8          | (53.386 – 68.301) |                 | 59.196                    | (51.735 – 66.656) |                 |
|                   | T2              | 18 (13.6)        | 61.8          | (46.606 – 76.898) |                 | 63.082                    | (46.936 – 79.228) |                 |
|                   | T3              | 23 (17.4)        | 41.4          | (28.486 – 54.359) |                 | 29.114                    | (19.257 – 38.972) |                 |
| cN classification | N0              | 95 (72.0)        | 67.8          | (60.830 – 74.769) | 0.000           | 62.478                    | (55.364 – 69.592) | 0.011           |

|                         |                      |           |      |                   |       |        |                   |       |
|-------------------------|----------------------|-----------|------|-------------------|-------|--------|-------------------|-------|
|                         | N1                   | 29 (22.0) | 51.8 | (39.811 – 63.795) |       | 55.907 | (43.140 – 68.673) |       |
|                         | N2                   | 8 (6.0)   | 26.4 | (12.963 – 39.787) |       | 11.986 | (5.770 – 66.246)  |       |
| RT dose                 | < 6600               | 53 (40.2) | 45.2 | (37.964 – 52.342) | 0.057 | 49.268 | (42.060 – 56.476) | 0.537 |
|                         | ≥ 6600               | 79 (59.8) | 66.2 | (58.767 – 73.716) |       | 58.139 | (50.201 – 66.077) |       |
| PBT technique           | Passive scattering   | 76 (57.6) | 58.1 | (50.335 – 65.795) | 0.081 | -      | -                 | 0.080 |
|                         | Pencil beam scanning | 56 (42.4) | 60.6 | (54.303 – 66.811) |       | -      | -                 |       |
| Concurrent chemotherapy | No                   | 81 (61.4) | 65.3 | (56.655 – 73.959) | 0.067 | -      | -                 | 0.142 |
|                         | Yes                  | 51 (38.6) | 52.6 | (42.988 – 62.140) |       | -      | -                 |       |
| Concurrent chemotherapy | No                   | 69        | 65.1 | (57.484 – 72.781) | 0.251 | -      | -                 |       |
| (Stage I)               | Yes                  | 22        | 50.7 | (38.614 – 69.538) |       | -      | -                 |       |

ECOG PS, European Cooperative Oncology Group Performance score; EG Junction, Esophagogastric junction; RT, Radiotherapy; PBT, Proton beam therapy; CI, Confidence interval
