# Supplementary material for: Treatment Outcomes of Proton Beam Therapy for Esophageal Squamous Cell Carcinoma at a Single Institute
Source: MDPI journal article supplement (doi:10.3390/cancers15235524), 2023-11-22
Supplement: s1 [file s1]

**Supplementary Table S2.** Multivariate analysis for overall survival

|                                           |    | No. of patients (%) | HR    | 95% CI           | <i>p</i> -value |
|-------------------------------------------|----|---------------------|-------|------------------|-----------------|
| cN classification                         | N0 | 95 (72.0)           | 1     |                  |                 |
|                                           | N1 | 29 (22.0)           | 1.782 | (0.850 – 3.738)  | 0.126           |
|                                           | N2 | 8 (6.0)             | 5.442 | (2.167 – 13.664) | 0.000           |
| HR, Hazard ratio; CI, Confidence interval |    |                     |       |                  |                 |
